# Supplementary material
Source: PubMed Central journal article supplement (PMC3469454)
Supplement: epi-7-1125-s01.pdf [file epi-7-1125-s01.pdf]

**Supplemental Material to:**

St-Pierre J, Hivert M, Perron P, Poirier P, Guay S, Brisson D, et al. IGF2 DNA methylation is a modulator of newborn's fetal growth and development. *Epigenetics* 2012; 7(10); <http://dx.doi.org/10.4161/epi.21855>

<http://www.landesbioscience.com/journals/epigenetics/article/21855/>

Supplementary Table 1 – PCR and pyrosequencing primers for *IGF2/H19* CpG island loci amplification and analysis.

| <b>Amplified region</b>          | <b>PCR and pyrosequencing primers</b>                                                                                  | <b>Length (bp)</b> | <b>T<sup>o</sup>hyb</b> |
|----------------------------------|------------------------------------------------------------------------------------------------------------------------|--------------------|-------------------------|
| <i>IGF2</i> -DMR0-A2<br>(2 CpGs) | F: 5'bio-ATGAATGAGTATTTTTAGGGAAATTGTT-3'<br>R: 5'-TCCATATCCCCCTAAATTTAACTTCT-3'<br>Seq: 5'-AGGGAAATTGTTTTGG-3'         | 166 bp             | 62.6°C                  |
| <i>IGF2</i> -DMR0-A1<br>(3 CpGs) | F: 5'-GGGGGTTTTAGTAAAAGTTATTGG-3'<br>R : 5'bio-ACTCCTCCATCCACCCAAAATAATATCTA-3'<br>Seq: 5'-AGTAAAAGTTATTGGATATATAGT-3' | 198 bp             | 60.2°C                  |
| <i>IGF2</i> -DMR2<br>(8 CpGs)    | F: 5'bio-GGGTTTTGGGTGGGTAGAGT-3'<br>R: 5'-CCAAAACAACCTCCCCAAAT-3';<br>Seq: 5'-GTTTGGTTTTTTTTGAA-3'                     | 230 bp             | 60.2°C                  |
| <i>H19</i> -DMR<br>S1 (6 CpGs)   | F: 5'-bio-TGGGTATTTTTGGAGGTTTTTTT-3'<br>R: 5'-ATAAATATCCTATCCCAAATAA-3'<br>Seq: 5'-TTTATYGTTTGGATGG-3'                 | 239 bp             | 55.4°C                  |

F; Forward. R; Reverse.
